# Supplementary material for: Medical, behavioural and social preconception and interconception risk factors among pregnancy planning and recently pregnant Canadian women
Source: HighWire-hosted journal article supplement (doi:10.1136/fmch-2021-001175), 2022-09-01
Supplement: fmch-2021-001175supp001_data_supplement.pdf [file fmch-2021-001175supp001_data_supplement.pdf]

Appendix 1. Unstandardized Factor Loadings for the 8-Dimensional Model of Preconception Health Risk Factors in Subsample of Pregnancy Planning Women (n=529)

|                               | Cluster 1      | Cluster 2         | Cluster 3                | Cluster 4            | Cluster 5                           | Cluster 6      | Cluster 7                           | Cluster 8                |
|-------------------------------|----------------|-------------------|--------------------------|----------------------|-------------------------------------|----------------|-------------------------------------|--------------------------|
|                               | <b>Thyroid</b> | <b>Low income</b> | <b>Delivery outcomes</b> | <b>Mental health</b> | <b>Fertility/pregnancy outcomes</b> | <b>Smoking</b> | <b>Fertility/pregnancy outcomes</b> | <b>Health behaviours</b> |
| Prescription medication       | 0.909          | 0.018             | 0.055                    | 0.129                | 0.053                               | 0.356          | 0.081                               | 0.006                    |
| Thyroid disease               | 0.774          | 0.003             | 0.266                    | 0.065                | 0.225                               | 0.022          | 0.109                               | 0.009                    |
| Low income                    | 0.035          | 0.861             | 0.014                    | 0.02                 | 0.245                               | 0.036          | 0.04                                | 0.086                    |
| Unemployment                  | 0.101          | 0.63              | 0.069                    | 0.003                | 0.116                               | 0.022          | 0.081                               | 0.006                    |
| Frequent alcohol              | 0.198          | 0.599             | 0.024                    | 0.258                | 0.016                               | 0.061          | 0.095                               | 0.085                    |
| Unplanned c-section           | 0.008          | 0.012             | 0.757                    | 0.032                | 0.083                               | 0.012          | 0.134                               | 0.051                    |
| Planned c-section             | 0.123          | 0.224             | 0.568                    | 0.064                | 0.006                               | 0.047          | 0.005                               | 0.016                    |
| High birthweight              | 0.048          | 0.099             | 0.359                    | 0                    | 0.148                               | 0.064          | 0.082                               | 0.041                    |
| Depression                    | 0.01           | 0.001             | 0.081                    | 1.111                | 0.075                               | 0.037          | 0.1                                 | 0.045                    |
| Anxiety                       | 0.127          | 0.02              | 0.013                    | 0.74                 | 0.153                               | 0.187          | 0.016                               | 0.03                     |
| Loneliness                    | 0.026          | 0.251             | 0.03                     | 0.512                | 0.346                               | 0.042          | 0.092                               | 0.012                    |
| Asthma                        | 0.178          | 0.027             | 0.039                    | 0.356                | 0.045                               | 0.062          | 0.293                               | 0.185                    |
| Gestation diabetes            | 0.013          | 0.014             | 0.202                    | 0.006                | 0.708                               | 0.002          | 0.332                               | 0.023                    |
| High pregnancy blood pressure | 0.005          | 0.023             | 0.147                    | 0.044                | 0.391                               | 0.027          | 0.44                                | 0.371                    |
| Over-the-counter medication   | 0.191          | 0.085             | 0.046                    | 0.113                | 0.28                                | 0.091          | 0.113                               | 0.1                      |
| ART use                       | 0.146          | 0.255             | 0.044                    | 0.071                | 0.269                               | 0.2            | 0.039                               | 0.187                    |
| Complementary medication      | 0.118          | 0.237             | 0.092                    | 0.053                | 0.25                                | 0.145          | 0.036                               | 0.075                    |
| Tobacco use                   | 0.025          | 0.413             | 0.045                    | 0.002                | 0.019                               | 0.986          | 0.011                               | 0.039                    |
| Cannabis use                  | 0.086          | 0.044             | 0.056                    | 0.03                 | 0.043                               | 0.699          | 0.016                               | 0.077                    |
| Preterm birth                 | 0.237          | 0.255             | 0.156                    | 0.077                | 0.27                                | 0.298          | 0.062                               | 0.013                    |
| BMI status                    | 0.012          | 0.002             | 0.013                    | 0.022                | 0.007                               | 0.022          | 1.109                               | 0.008                    |

|                       |       |       |       |       |       |       |       |       |
|-----------------------|-------|-------|-------|-------|-------|-------|-------|-------|
| Miscarriage           | 0.016 | 0.05  | 0.01  | 0.1   | 0.006 | 0.19  | 0.264 | 0.111 |
| Poor eating habits    | 0.022 | 0.021 | 0.056 | 0.296 | 0.016 | 0.176 | 0.003 | 0.709 |
| Low physical activity | 0.092 | 0.223 | 0.013 | 0.092 | 0.039 | 0.132 | 0.114 | 0.42  |

Only risk factors prevalent in  $\geq 5\%$  of the sample were included in this model

\*Artificial Reproduction Technology
